1 **Southern Ethiopian skilled birth attendant variations and**  
2 **maternal mortality: a multilevel study of a population-**  
3 **based cross-sectional household survey**

4

5

6 **Southern Ethiopian skilled birth attendant variations and maternal**  
7 **mortality**

8

9 Authors

10 Aschenaki Zerihun Kea<sup>1, 2\*</sup>, Bernt Lindtjorn<sup>1, 2</sup>, Achamyesh Gebretsadik Tekle<sup>1</sup>, Sven

11 Gudmund Hinderaker<sup>2</sup>

12

13 Affiliations

14 <sup>1</sup> School of Public Health, College of Medicine and Health Sciences, Hawassa University,

15 Hawassa, Ethiopia

16 <sup>2</sup> Centre for International Health, University of Bergen, Bergen, Norway

17 \*Corresponding author

18 [Email: aschenakizer@yahoo.com](mailto:aschenakizer@yahoo.com); [aschekea@gmail.com](mailto:aschekea@gmail.com) (AZK)

NOTE: This preprint reports new research that has not been certified by peer review and should not be used to guide clinical practice.

## 19 **Abstract**

### 20 **Introduction**

21 Studies examining skilled birth attendants (SBA) use and its correlation with maternal  
22 mortality at lower administrative levels are scarce. This study assessed the coverage and  
23 variations of SBA, the physical accessibility of health facilities for SBA, and the association of  
24 SBA with maternal mortality.

### 25 **Materials and methods**

26 A cross-sectional study using a population-based household survey was conducted in six  
27 Sidama National Regional State, southern Ethiopia districts, from July 2019 to May 2020.  
28 Women who had given birth in the past two years prior to the study were included. Stata 15  
29 and ArcGIS 10.4.1 were used for data analysis. A multilevel logistic regression analysis was  
30 conducted to assess the effect of the sampling units and identify factors independently  
31 associated with SBA. The association between SBA and maternal mortality was examined  
32 using data from a maternal mortality household survey.

### 33 **Results**

34 A total of 3191 women were interviewed. The coverage of SBA was 46.7%, with high  
35 variations in the districts. Thirty percent of SBA use was accounted for by the differences  
36 among the districts. One-third of the women travel more than two hours to access the  
37 nearest hospital. Districts with low coverage of SBA and located far away from the regional  
38 referral centre had high maternal mortality. Education of the mother, occupation of the  
39 husband, pregnancy-related complications, use of antenatal care, parity, and distance to the  
40 nearest hospital and health centre were associated with the use of SBA.

## 41 Conclusions

42 The coverage of SBA in the Sidama Region was low, with high variations in the districts. Low  
43 SBA use was associated with high maternal mortality. Due attention should be given to  
44 districts with low coverage of SBA and those located far away from the referral centre.  
45 Access to hospitals has to improve. All women should be encouraged to get antenatal care  
46 services.

## 47 Introduction

48 The time around labour, childbirth, and the first week post-delivery holds a higher risk of  
49 death for mothers and new-borns [1]. Hence, every mother should be assisted by a skilled  
50 birth attendant (SBA) during this critical time. SBA is defined as a competent maternal and  
51 new-born health professional, trained and regulated to national and international standards  
52 [2]. It includes doctors, midwives, and nurses who perform all signal functions of emergency  
53 maternal and new-born care to optimise the health and well-being of women and new-  
54 borns [2].

55 Globally, a skilled attendant at birth has been considered one of the key interventions to  
56 reduce maternal mortality and an indicator used to monitor the progress of maternal  
57 mortality reduction [3]. Studies conducted using the data of countries from international  
58 databases and systematic reviews demonstrated that there existed an inverse relationship  
59 between SBA and maternal mortality: high coverage of SBA was associated with low  
60 maternal mortality [4-6]. However, the effect of SBA on maternal mortality is not well  
61 studied at the subnational and district levels using primary data.

62 In low and middle-income countries (LMICs), access to maternal health services is poor [7],  
63 and the coverage of skilled birth attendance is low [8-10]. As a result, many births are  
64 attended by unskilled birth attendants, like traditional birth attendants, neighbours,  
65 mother-in-law, and husbands; some even take place without any assistance [11, 12]. Besides  
66 poor access and low coverage of SBA in LMICs, the existing health care is not uniformly  
67 accessible to all segments of the population [13-17]. Reaching every woman by minimising  
68 inequalities in access and improving the coverage of care is one of the strategic objectives to  
69 end preventable maternal mortality [18].

70 The utilisation of SBA services can be affected by several factors related to maternal  
71 characteristics such as the age of the mother [19], educational status [10], use of antenatal  
72 care (ANC) [10], parity [19], pregnancy-related complications [12], household characteristics  
73 like husband education [9], occupation of the husband [20], wealth status [9, 19], and  
74 distance or travel time required to access a health facility [21].

75 Like other LMICs, Ethiopia has an unacceptably high maternal mortality [22, 23]. Despite an  
76 increasing trend in the coverage of skilled birth attendance since 2000 [24], coverage and  
77 access to SBA are still low in the country [10, 16]. In Ethiopia, there is a dearth of studies  
78 conducted to assess the utilisation of skilled birth attendants [10, 25, 26]. However, this  
79 study tries to answer the following questions: what is the coverage and disparities of SBA in  
80 Sidama Region and the districts, how physically accessible the health centres and hospitals  
81 are to pregnant women and how they are utilized by the women during labour and  
82 childbirth, and does SBA have an effect on the magnitude of maternal mortality in districts  
83 of Sidama Region.

84 We conducted this study as part of a larger study that aimed at measuring maternal  
85 mortality in Sidama National Regional State, employing a population-based household  
86 survey with a five-year recall of pregnancy and birth outcomes and the sisterhood method  
87 [11, 27]. We found that the maternal mortality ratio (MMR) was 419 per 100,000 live births  
88 (LB) by five-year recall and 623 per 100,000 LB by the sisterhood method, with large  
89 variations by district [11, 27]. The studies also identified that districts far from the regional  
90 capital, with poor infrastructure and inadequate skilled health personnel, had a higher rate  
91 of maternal mortality [11, 27].

92 Hence, we carried out this study with the following specific objectives: 1) determine SBA  
93 coverage and district-level variations; 2) identify factors associated with SBA; 3) assess the  
94 geographical accessibility of health centres and hospitals to SBA; 4) examine the association  
95 between SBA and the maternal mortality ratio in the Sidama Region.

## 96 **Materials and methods**

### 97 **Study design, setting, and period**

98 A population-based cross-sectional household survey was conducted in six districts of  
99 Sidama National Regional State, southern Ethiopia, from July 2019 to May 2020. The details  
100 of the study setting have been described elsewhere [11].

### 101 **Study population and sampling techniques**

102 Women in the reproductive age group of 15-49 years in Sidama National Regional State who  
103 had given birth in the past two years preceding the survey were the source population.

104 Women of the same age range who resided in sampled households and had given birth two  
105 years before the survey were the study population. In the period between 1 July 2019 and

106 31 May 2020, a total of 3191 women who had given birth in the past two years before the  
107 study were recruited from the sampled households in Sidama Region.

108 The sampling techniques of the study have been described elsewhere [11]. Below, we briefly  
109 describe the summary of the sampling technique. We employed multistage cluster sampling  
110 techniques. Firstly, we randomly selected six districts out of the 30 districts in the region.  
111 Secondly, we selected 40 kebeles (the smallest administrative structure with an average  
112 population of 5000 people) from the six districts, proportional to the size of the kebeles.  
113 Thirdly, from each kebele, we sampled six limatbudin (administrative units organised by 40-  
114 50 neighbouring households), and finally, we selected 37 households from each limatbudin.  
115 In the sampled households, we interviewed women who had given birth in the past two  
116 years before the survey. Households in which women had given birth more than two years  
117 before the survey were not included in the study. If a woman had given birth twice in the  
118 past two years before the survey, we chose the most recent birth experience for the study.

## 119 **Variables**

120 The main outcome measure of the study was the use of a skilled attendant during childbirth,  
121 which was derived from the question, “Who assisted the delivery of your last birth?” This  
122 gives a dichotomized response that categorises the study participants into two groups:  
123 women who used skilled birth attendants and those who used unskilled birth attendants.  
124 Operationally, we defined a woman as having used a skilled birth attendant when she gave  
125 birth with the assistance of skilled health personnel such as nurses, midwives, health  
126 officers, and doctors [2], and the delivery was conducted at government health facilities:  
127 health centres and hospitals, faith-based clinics, private clinics, or hospitals. In contrast, we  
128 defined women who used unskilled birth attendants as those who gave birth with the

129 assistance of unskilled birth attendants like health extension workers (HEWs), TBAs, mother-  
130 in-law, husbands, and neighbours [15, 28].

131 According to the Ethiopian health system, health centres are responsible for basic  
132 emergency obstetric and new-born care (BEmONC), including delivery services. Hospitals  
133 provide comprehensive emergency obstetric care (CEmONC), including all BEmONC services,  
134 obstetric surgery, and blood transfusion [29]. Health posts, run by the HEWs, provide  
135 disease prevention and health promotion activities and some basic curative services [30]. As  
136 the government of Ethiopia promotes SBA, the HEWs do not provide delivery services as  
137 part of their routine duties except to assist mothers who come to their knowledge during an  
138 emergency and facilitate referral to the catchment health centre or primary hospital [30].

139 The explanatory variables in this study include background characteristics of women like  
140 age, education, history of parity, ANC visits, pregnancy-related complications, family or  
141 household characteristics such as education of the husband, occupation of the head of  
142 household, socioeconomic status (wealth index) of the household, and distance from the  
143 residential location to the nearest health centre and the nearest hospital.

## 144 **Data source and measurement**

145 An interviewer-administered questionnaire was used to collect the data from women who  
146 were of childbearing age, 15-49 years old, and who had given birth in the past two years  
147 before the study. The data was collected by diploma-level teachers recruited from each  
148 *kebele* who were familiar with the culture and language of the study area.

149 During the household visit, the data collectors recorded the geographic coordinates  
150 (latitude and longitude) of residential locations, the nearest health centres, and hospitals  
151 using the Garmin ETrex 10 handheld global positioning system (GPS).

152 The age of a woman was collected and registered in a completed year. The educational level  
153 of the woman and husband was registered as “completed grade” and further categorised as  
154 “no formal education,” “grade 1-4,” “grade 5-8,” “grade 9-12,” and “high school or above.”

155 The occupation of the head of the household was identified as the main source of income  
156 and registered as a farmer, trader, government employee, and others. The history of  
157 pregnancy-related complications was assessed using questions eliciting whether a woman  
158 had pregnancy-related complications during pregnancy or childbirth.

159 The household's wealth status was estimated by creating a wealth index using household  
160 assets and facility variables. We used principal component analysis (PCA) to create a  
161 household wealth index [31]. The wealth index initially had five centiles: poorest, poor,  
162 middle, rich and richest. Later, we classified the poorest, poor and middle as “poor” and the  
163 rich and richest as “rich” for analysis. The variables used for wealth index creation have  
164 been described elsewhere [11].

165 The distance from the residential location to the nearest health centre and hospital was  
166 calculated by a straight line or Euclidean distance [32, 33] employing the “Near Analysis”  
167 function in ArcGIS 10.4.1.

## 168 **Data quality control**

169 The questionnaire for the study was prepared after reviewing the relevant literature. We  
170 initially prepared the questionnaire in English, translated it into the local language (*Sidaamu*



171 *Afoo*), and had it back-translated to English by another individual to check its consistency.

172 Before data collection, the questionnaire was pretested in one district not included in the  
173 study.

174 The principal investigator trained the data collectors and supervisors for three days. The  
175 training included discussion on the content and aim of each question, interview techniques,  
176 role plays, how to operate, read, and record geographical coordinates using GPS (Garmin  
177 ETREX 10), and a field test.

178 Two public health officers recruited from each district who were familiar with the culture  
179 and language of the study setting supervised the data collectors. The supervisors followed  
180 the data collectors and checked the consistency and completeness of the questionnaire  
181 daily. When eligible respondents were absent during the initial visit, the data collectors  
182 revisited the households the next day.

183 The data was double entered using EpiData software (EpiData Association 2000-2021,  
184 Denmark). The consistency of the two entries was checked, and discrepancies were  
185 validated from the hard copies of the questionnaire. To maintain the quality of spatial data,  
186 the coordinates of residential locations, the nearest health centres, and the nearest  
187 hospitals were recorded both on a GPS device and on paper and double-checked for  
188 consistency.

189 To confirm the place of delivery reported by mothers, we asked different verification and  
190 probing questions: asked a woman to mention the name of the health facility she had given  
191 birth to, whether a birth certificate was provided or not during childbirth, whether the baby  
192 was vaccinated, and whether immediate post-natal counselling was given to the mother.

## 193 **Sample size determination**

194 The estimated sample size for this study was determined based on the following  
195 assumptions: 50% prevalence of skilled delivery [34], a design effect of 2 (as the study  
196 employed the multistage cluster sampling method), and precision +/-5%. Hence, the sample  
197 size calculated was 768 women who gave birth in the past two years prior to the survey.  
198 Adding 10% non-response, the final sample size needed was 845 women.

199 This study is part of a larger maternal mortality study, and the sample of households needed  
200 for the larger study was 8880 households, with the corresponding number of mothers [11].  
201 We assumed that surveying the 8880 households would be sufficient to get the desired  
202 sample of women for this study, which enables us to estimate the coverage of SBA.

## 203 **Data analysis**

204 We used Stata 15 (Stata Corp., College Station, TX) for data analysis. Frequency analysis like  
205 mean (SD), proportions, and percentages were computed to describe the outcome and  
206 explanatory variables. A bivariate analysis using the Chi-square test was conducted to identify  
207 factors associated with the outcome variable; SBA. To account for the hierarchical nature of  
208 the data, where individual mothers are nested within a household, households are nested in  
209 limatbudin, limatbudins are nested in kebeles, and kebeles are nested in districts, a multilevel  
210 mixed-effect logistic regression model (MLLR) was employed.

211 The MLLR analysis aimed to understand the extent of variations in SBA accounted for by the  
212 three sampling units (limatbudin, kebele, and district) and assess factors independently  
213 associated with the outcome variable. Variables with a p-value <0.2 in the bivariate analysis  
214 were considered for MLLR analysis [12]. Four models were fitted. The first model was the

215 null model, which had no explanatory variables. The null model was used to assess the  
216 random effect of the sampling units. The second model contained individual variables, the  
217 third model adjusted for household-level factors, and the fourth model included both  
218 individual and household-level variables. Intra-cluster correlation (ICC) was used to assess  
219 the random effect. Model fitness was assessed using Akaike's Information Criterion (AIC).

220 To assess the strength of the association between explanatory variables and the outcome  
221 variable, crude and adjusted odds ratios with a 95% confidence interval (CI) were computed.  
222 Associations with a p-value <0.05 in the MLLR model were considered significant. A stratified  
223 analysis was conducted to assess confounding and effect modification using the estimates of  
224 stratum-specific, crude, and adjusted odds ratios.

225 We also assessed the association between the coverage of SBA and the maternal mortality  
226 ratio (MMR). The MMR data was obtained from a maternal mortality household survey  
227 conducted in the study area where the current study was conducted as part of the study  
228 [11].

229 We assumed women residing in locations within 10 km of the nearest health centre or the  
230 nearest hospital have good physical accessibility to SBA services [35], whereas women who  
231 live in areas outside 10 km of the nearest health centre or the nearest hospital are assumed  
232 to have poor physical accessibility to SBA services [35]. ArcGIS 10.4.1 (ESRI, Redlands, CA,  
233 USA) software was used to measure the distance between residential locations and the  
234 nearest hospital and health centre. We assumed that 2 hours of walking time are required  
235 to travel 10 km [36].

## 236 Ethical approval

237 We obtained ethical approval for this study from the institutional review board of Hawassa  
238 University College of Medicine and Health Sciences (IRB/015/11) and the Regional Ethical  
239 Committee of Western Norway (2018/2389/REK Vest). We got support letters from the  
240 Sidama National Regional State Health Bureau (formerly known as the Sidama Zone Health  
241 Department), the district health offices, and the kebele administrations. Informed  
242 (thumbprint and signed) consent was obtained from the respondents. To maintain the  
243 anonymity of the study participants, we did not collect any personal identifying information  
244 during data collection. In this study, we did not find minors (women below the age of 18  
245 years). Hence, we did not require consent from parents or guardians.

## 246 Result

### 247 Sociodemographic and obstetric backgrounds of study participants

248 Table 1 describes the sociodemographic and obstetric backgrounds of the participant  
249 women and their household characteristics. A total of 3191 (100%) women of childbearing  
250 age (15-49 years) were interviewed. The mean age of the women was 25.2 years, and 145  
251 (4.5%) were under the age of 20 years.

252 Twenty-two percent, 698 (21.9%) women, had no formal education, 790 (24.8%) did not  
253 have antenatal care (ANC), and 2401 (75.2%) had at least one antenatal visit. Among those  
254 who had ANC, 853 (35.5%) had four or more ANC visits. Mothers who reported at least one  
255 pregnancy-related complication during pregnancy or childbirth were 1246 (39%). The  
256 husbands of the women with no formal education were 420 (13.2%). Three-fifths of the  
257 women, 1932 (60.5%), were from poor households, and 2276 (71.3 %), the heads of the  
258 households, were engaged in farming activities.

259 **Table 1.** Background characteristics of study women and households, Sidama National  
260 Regional State, 2020.

| <b>Variable</b>                                        | <b>Number</b> | <b>Percent</b> |
|--------------------------------------------------------|---------------|----------------|
| <b>Age of mother:</b>                                  |               |                |
| 15-19                                                  | 145           | 4.5            |
| 20-24                                                  | 1146          | 35.9           |
| 25-29                                                  | 1147          | 35.9           |
| 30-34                                                  | 546           | 17.1           |
| 35+                                                    | 207           | 6.8            |
| <b>Education of mother</b>                             |               |                |
| No formal education                                    | 698           | 21.9           |
| 1-4 Grade                                              | 1004          | 31.5           |
| 5-8 Grade                                              | 1102          | 34.5           |
| 9-12 Grade (High School)                               | 316           | 9.9            |
| Above high school                                      | 71            | 2.2            |
| <b>Had ANC</b>                                         |               |                |
| No                                                     | 790           | 24.8           |
| Yes                                                    | 2401          | 75.2           |
| <b>Number of ANC visit</b>                             |               |                |
| Less than 4 ANC visits                                 | 1548          | 64.5           |
| Four or more ANC visits                                | 853           | 35.5           |
| <b>Had at least one pregnancy related complication</b> |               |                |
| No                                                     | 1945          | 61.0           |
| Yes                                                    | 1246          | 39.0           |
| <b>Education of husband</b>                            |               |                |
| No formal education                                    | 420           | 13.2           |
| 1-4 Grade                                              | 730           | 22.9           |
| 5-8 Grade                                              | 1393          | 43.7           |
| 9-12 Grade (High School)                               | 461           | 14.4           |
| Above high school                                      | 187           | 5.9            |
| <b>Wealth index of household</b>                       |               |                |
| Poor                                                   | 1932          | 60.5           |
| Rich                                                   | 1259          | 39.5           |
| <b>Occupation of household head</b>                    |               |                |
| Farming                                                | 2276          | 71.3           |
| Non-farming (trading, gov't employee etc.)             | 915           | 28.7           |
| <b>Distance to the nearest hospital</b>                |               |                |
| Outside 10 km                                          | 1052          | 33.0           |
| Below 10 km                                            | 2139          | 67.0           |
| <b>Distance to the nearest health centre</b>           |               |                |
| Between 5-10 km                                        | 225           | 7.1            |
| Below 5 km                                             | 2966          | 92.9           |

Note: ANC: Antenatal care, km: kilometre

## 261 **Place of delivery and assistance during delivery**

262 Table 2 presents the place and assistance for delivery. We found that 46.9% of mothers  
263 delivered at health facilities and 53.1% delivered at home. Among mothers who had given  
264 birth at a health facility, 99.7% were assisted by skilled health personnel, whereas health  
265 extension workers assisted 0.3% of deliveries.

266 Among mothers who had given birth at health facilities, 84.4% had normal, 11.2% had  
267 instrumental, and 4.4% had caesarean section deliveries. Mothers who had given birth at a  
268 health facility used an ambulance in 47% of cases, and 31.3% went by foot to reach the  
269 health facility for delivery service. After reaching the first health facility, 12.8% of mothers  
270 were referred to another health facility.

271 Of mothers who had given birth at home, 20.8% were assisted by traditional birth  
272 attendants (TBAs), 41.5% by their mother-in-law, 6.1% by their husbands, and 17.8% by  
273 neighbours; 13.8% of home births had no assistant.

274

275

276

277

278

279

280

281 **Table 2.** Delivery place and assistance during delivery, Sidama National Regional State,  
282 southern Ethiopia, 2020

| <b>Variable</b>                                       | <b>Number</b> | <b>Percent</b> |
|-------------------------------------------------------|---------------|----------------|
| <b>Delivery place</b>                                 |               |                |
| Home                                                  | 1694          | 53.1           |
| Health post                                           | 5             | 0.2            |
| Health centre                                         | 931           | 29.2           |
| Hospital                                              | 541           | 17.0           |
| Faith based clinic                                    | 20            | 0.6            |
| <b>Mode of institutional delivery</b>                 |               |                |
| Normal                                                | 1263          | 84.4           |
| Instrumental                                          | 168           | 11.2           |
| Caesarean section                                     | 66            | 4.4            |
| <b>Health facility delivery attendant</b>             |               |                |
| Health extension worker                               | 5             | 0.3            |
| Nurse                                                 | 486           | 32.5           |
| Midwife                                               | 803           | 53.6           |
| Doctor                                                | 203           | 13.6           |
| <b>Attendant of home delivery</b>                     |               |                |
| Traditional birth attendant                           | 352           | 20.8           |
| Mother in law                                         | 703           | 41.5           |
| Husband                                               | 104           | 6.1            |
| Neighbour                                             | 301           | 17.8           |
| No assistant/alone                                    | 234           | 13.8           |
| <b>Reason for not giving birth at health facility</b> |               |                |
| Not necessary                                         | 161           | 9.5            |
| Not customary                                         | 982           | 58.0           |
| Preferred TBA                                         | 89            | 5.3            |
| Health facility incur cost                            | 7             | 0.4            |
| Did not have money                                    | 23            | 1.4            |
| Health facility far away                              | 178           | 10.5           |
| Transportation problem                                | 184           | 10.9           |
| Did not have accompany                                | 30            | 1.8            |
| Low quality service at health facility                | 16            | 0.9            |
| Family did not allow                                  | 24            | 1.4            |

Note: TBA: Traditional birth attendant

## 283 **Spatial accessibility, variations, and utilisation of skilled birth care**

284 The mean distance from the women's residential locations to the nearest health centre was  
285 2.6 km, ranging from 0 to 8.5 km. All 3191 women lived within 10 km of the nearest health  
286 centre.

287 Of the 1492 mothers assisted by skilled health personnel during birth, 1391 (93.2%) lived  
288 within 5 km and 101 (6.8%) between 5 and 10 km of the nearest health centre. Among the  
289 1699 mothers who gave birth at home, 1551 (91.3%) lived within 5 km and 148 (8.7%)  
290 between 5 and 10 km of the nearest health centre.

291 The mean distance from the women's residential locations to the nearest hospital was 8.5  
292 km, ranging from 1 to 22 km. Two-thirds of the women, 2137 (67%), resided within 10 km,  
293 whereas one-third, 1054 (33%), lived in areas more than 10 km from the nearest hospital.

294 Of the 1492 mothers who had given birth assisted by skilled health personnel, 1215 (81.4%)  
295 lived within 10 km, while 277 (19.6%) lived more than 10 km from the nearest hospital.

296 Among the 1699 mothers who had given birth at home, 922 (54.3%) lived within 10 km, and  
297 777 (45.7%) lived more than 10 km from the nearest hospital.

298 Table 3 shows household and district-level accessibility variations to the nearest health  
299 centre, the nearest hospital, and the regional referral centre, Hawassa. The proportion of  
300 women living more than 5 km from the nearest health centre was 20.8% in Aleta Chuko  
301 district, 17.6% in Daela, and 12.7% in Aroresa. Three districts had a high proportion of women  
302 living more than 10 km from the nearest hospital: Daela (100%), Wondogenet (99.4%), and  
303 Aroresa (34.2%). The same districts had the lowest SBA. Aroresa and Daela districts are



304 considered remote districts located 181 km and 175 km from the regional centre, Hawassa,  
 305 respectively.

306 **Table 3.** Accessibility variations, Sidama National Regional State, southern Ethiopia, 2020

| District       | Total women | Nearest Health Centre |                       |                            |      | Nearest Hospital   |                       |                             |       | Referral hospital, Hawassa                          |
|----------------|-------------|-----------------------|-----------------------|----------------------------|------|--------------------|-----------------------|-----------------------------|-------|-----------------------------------------------------|
|                |             | Mean distance (km)    | Maximum distance (km) | Women residing outside 5km | %    | Mean distance (km) | Maximum distance (km) | Women residing outside 10km | %     | Mean distance (km) from district to referral centre |
| Aleta Chuko    | 596         | 3                     | 8.5                   | 124                        | 20.8 | 6.7                | 12.4                  | 55                          | 9.2   | 61                                                  |
| Aleta Wondo    | 704         | 1.7                   | 6.4                   | 1                          | 0.1  | 6.4                | 14.0                  | 97                          | 13.8  | 64                                                  |
| Aroresa        | 503         | 3.4                   | 5.8                   | 64                         | 12.7 | 6.8                | 14.2                  | 172                         | 34.2  | 181                                                 |
| Daela          | 205         | 3.4                   | 6.9                   | 36                         | 17.6 | 12.5               | 14.8                  | 205                         | 100.0 | 175                                                 |
| Hawassa Zuriya | 658         | 2.5                   | 4.9                   | 0                          | 0.0  | 5.4                | 18.6                  | 1                           | 0.2   | 21                                                  |
| Wondogenet     | 525         | 2.3                   | 4.6                   | 0                          | 0.0  | 17.0               | 21.9                  | 522                         | 99.4  | 25                                                  |
| Total          | 3191        | 2.6                   | 8.5                   | 225                        | 7.1  | 8.5                | 21.9                  | 1052                        | 33.0  |                                                     |

Note: Km: kilometre

307

### 308 **Variations in the use of skilled birth attendants and maternal** 309 **mortality**

310 Table 4 describes the proportion of deliveries with skilled birth attendants in districts of  
 311 Sidama Region and the corresponding maternal mortality ratio (MMR). The coverage of SBA  
 312 was less than 50% in three out of six districts. Daela district had the lowest SBA coverage;  
 313 5.4% (95% CI: 3.0-9.4), followed by Aroresa; 19.7% (95% CI: 16.4-23.4), and Wondogenet at  
 314 26.8% (95% CI: 23.2-30.8). The two districts with the lowest coverage of SBA, Aroresa and  
 315 Daela districts, had the highest MMR, with Aroresa district having a MMR of 1142 (95% CI:  
 316 693-1591) per 100,000 LB and Daela district having a MMR of 641 (95% CI: 77-1358) per  
 317 100,000 LB.

318 **Table 4.** Skilled birth attendants and maternal mortality ratio by district, Sidama National  
 319 Regional State, southern Ethiopia, 2020

| District       | Skilled birth attendant (SBA) |                  |       |           | Maternal mortality ratio (MMR) |          |
|----------------|-------------------------------|------------------|-------|-----------|--------------------------------|----------|
|                | Total mothers interviewed     | Mothers used SBA | % SBA | 95% CI    | MMR                            | 95% CI   |
| Aleta Chuko    | 596                           | 375              | 62.9  | 59.0-66.7 | 263                            | 58-467   |
| Aleta Wondo    | 704                           | 498              | 70.7  | 67.3-74.0 | 525                            | 207-842  |
| Aroresa        | 503                           | 99               | 19.7  | 16.4-23.4 | 1142                           | 693-1591 |
| Daela          | 205                           | 11               | 5.4   | 3.0-9.4   | 641                            | 77-1358  |
| Hawassa Zuriya | 658                           | 368              | 55.9  | 52.1-59.7 | 114                            | 24-251   |
| Wondogenet     | 525                           | 141              | 26.8  | 23.2-30.8 | 258                            | 8-508    |

Note: CI: Confidence interval

320

### 321 **Factors associated with skilled birth attendants**

322 Table 5 shows the result of the mixed-effect multilevel logistic regression (MLLR) analysis.

323 The likelihood of utilization of SBA was higher among mothers with formal education (AOR:

324 1.5; 95% CI: 1.1-2.0), whose husbands were not engaged in farming (AOR: 1.5; 95% CI: 1.2-

325 1.9), who experienced pregnancy-related complications (AOR: 1.7; 95% CI: 1.4-2.2), and who

326 attended ANC visits (AOR: 10.3; 95% CI: 7.5-14.1). Multiparous women were less likely to

327 use skilled birth (AOR: 0.5; 95% CI: 0.4-0.6).

328 The intra-cluster correlation (ICC) for the districts was 0.30 (95% CI: 0.24-0.36), meaning

329 that 30% of the variations in use of SBA were attributable to the district-level differences.

330 We did not find significant ICC for limatbudin and kebele levels.

331 Distance to the nearest facility was associated with the use of SBA: a 1 km increase in

332 distance to the hospital decreased the proportion of SBA by 14%; a 1km increase in distance

333 to the health centre decreased the proportion of SBA deliveries by 25%.

334 **Table 5.** Multilevel logistic regression analysis of skilled birth attendants, Sidama National  
 335 Regional State, southern Ethiopia, 2020

| Variable                              | Type of birth |         |           | Bivariate analysis | Multilevel Logistic Regression Analysis |         |
|---------------------------------------|---------------|---------|-----------|--------------------|-----------------------------------------|---------|
|                                       | Total         | Skilled | Unskilled | COR (95% CI)       | AOR (95% CI)                            | P-value |
| <b>Fixed effect</b>                   |               |         |           |                    |                                         |         |
| <b>Age of mother</b>                  | 3191          |         |           | 0.9 (0.8-0.9)      | 0.9 (0.9-1.0)                           | 0.252   |
| <b>Education of mother</b>            |               |         |           |                    |                                         |         |
| No formal education                   | 698           | 184     | 514       | 1                  | 1                                       |         |
| Formal education                      | 2493          | 1308    | 1185      | 3.1 (2.6-3.7)      | 1.5 (1.1-2.0)                           | 0.041   |
| <b>Education of husband</b>           |               |         |           |                    |                                         |         |
| No formal education                   | 420           | 120     | 300       | 1                  | 1                                       |         |
| Formal education                      | 2771          | 1372    | 1399      | 2.4 (1.9-3.1)      | 1.0 (0.7-1.4)                           | 0.817   |
| <b>Wealth index of household</b>      |               |         |           |                    |                                         |         |
| Poor                                  | 1932          | 933     | 999       | 1                  | 1                                       |         |
| Rich                                  | 1259          | 559     | 700       | 0.8 (0.7-1.0)      | 1.0 (0.8-1.3)                           | 0.548   |
| <b>Occupation of husband</b>          |               |         |           |                    |                                         |         |
| Farming                               | 2276          | 966     | 1310      | 1                  | 1                                       |         |
| Non-farming*                          | 915           | 526     | 389       | 1.8 (1.6-2.1)      | 1.5 (1.2-1.9)                           | <0.001  |
| <b>Parity</b>                         |               |         |           |                    |                                         |         |
| Nulipara                              | 1063          | 624     | 439       | 1                  | 1                                       |         |
| Multipara                             | 2128          | 868     | 1260      | 0.5 (0.4-0.6)      | 0.5 (0.4-0.6)                           | <0.001  |
| <b>ANC</b>                            |               |         |           |                    |                                         |         |
| No                                    | 790           | 86      | 704       | 1                  | 1                                       |         |
| Yes                                   | 2401          | 1406    | 995       | 11.6 (9.1-14.7)    | 10.3 (7.5-14.1)                         | <0.001  |
| <b>Pregnancy related complication</b> |               |         |           |                    |                                         |         |
| Had no complication                   | 1945          | 838     | 1107      | 1                  | 1                                       |         |
| Had complication/s                    | 1246          | 654     | 592       | 1.4 (1.3-1.7)      | 1.7 (1.4-2.2)                           | <0.001  |
| <b>Distance (nearest Hosp. in km)</b> | 3191          |         |           | 0.89 (0.87-0.90)   | 0.86 (0.83-0.89)                        | 0.001   |
| <b>Distance (nearest HC in km)</b>    | 3191          |         |           | 0.76 (0.72-0.80)   | 0.75 (0.67-0.85)                        | <0.001  |
| <b>Random effect</b>                  |               |         |           |                    |                                         |         |
| ICC District                          |               |         |           |                    | 0.30 (0.24-0.36)                        |         |
| AIC                                   |               |         |           |                    | 3088                                    |         |

Note: \*Trading, government employee etc. AIC: Akaike's Information Criterion, AOR: Adjusted odds ratio  
 CI: Confidence interval, COR: Crude odds ratio, ICC: Intra-cluster correlation, HC: Health centre, Hosp: Hospital

## 337 Discussion

### 338 Main findings

339 In the Sidama region, the proportion of births attended by skilled health personnel was  
340 46.7%, with large variations between the districts. Thirty percent of variations in SBA are  
341 accounted for by the differences among the districts. Maternal mortality was high in  
342 districts where the proportion of births attended by skilled personnel was low. Factors  
343 associated with the use of SBA were education of the mother, occupation of the husband,  
344 pregnancy-related complications, ANC, parity, and distance to the nearest hospital and  
345 health centre.

### 346 Strengths and weaknesses of the study

347 In this study, we used the geographic coordinates of the nearest health centres and hospitals  
348 and coordinates collected at the individual household level to estimate the accessibility of the  
349 nearest health centres and hospitals as opposed to the commonly used village centroid.

350 This study had some limitations. Recall bias is a limitation of the study, as we asked about  
351 women's birth experiences in the past two years. However, giving birth is memorable, and  
352 recall bias is less likely. Social desirability bias: participants may state what they think is the  
353 acceptable response in the community, which can influence our results. However, we used  
354 different verification and probing questions to confirm the SBA. We could not establish a  
355 temporal relationship between the outcome and exposure variables due to the study's  
356 cross-sectional nature.

357 We could not find data on roads and modern transportation networks as the study was  
358 done in a rural area. Hence, we used Euclidean (straight line) distance to measure the

359 geographic accessibility of health centres and hospitals for SBA. The Euclidean method is  
360 recommended in rural settings to measure the accessibility of health facilities [32, 33].  
361 Studies have also documented that in a rural setting, estimates from straight line distance  
362 measurements are comparable with the results of driving distance and driving time [32].  
363 We may have missed births for women who are unmarried. However, we believe that in a  
364 rural setting, the majority of pregnancies are a result of marriage. Studies have shown that  
365 unmarried women do not constitute a significant number in such studies [12, 14]. We did  
366 not also find women who had a history of pregnancy below the age of 15 years.  
367 Since the crude and adjusted risk factors vary substantially (Table 5), we carried out  
368 stratified analysis to identify and control for confounding [37]. When we analysed the  
369 association between husband education and SBA, stratified by mother education, the  
370 difference between crude and adjusted odds ratios remained markedly different. This  
371 indicates that mother education is a confounder of husband education, as it is associated  
372 with the exposure (husband education) and the outcome (SBA). In other words, an educated  
373 husband is more likely to marry an educated woman, and mother education is a risk factor  
374 for SBA. In addition, there might be residual confounders that we did not consider in our  
375 study, which may have affected our results.

## 376 Coverage and district-level variations of skilled birth attendants

377 In Sidama Region, the proportion of deliveries using SBA was 46.7%, with large variations in  
378 the districts. This finding is comparable with the findings of other studies in the country [16,  
379 24, 34]. However, it is below the national plan for 2020 and the target set for the year 2025  
380 by Health Sector Transformation Plan II [38]. The global proportion of births using SBA is  
381 84%; however, in this study, the coverage of SBA is below the level of the sub-Saharan

382 African countries, at 52% [4]. The very low coverage of SBA in some districts in Sidama is  
383 attributable to the inaccessibility of health facilities, difficult topography, and lack of  
384 transportation, poor referral systems, and a shortage of skilled health professionals. Urgent  
385 action and concerted effort are needed to increase the use of SBA in the Sidama region and  
386 to support the country's efforts towards attaining the Sustainable Development Goal.

387 This study found that around one-third of the variation in SBA was attributed to the  
388 differences among districts. This result is higher than the findings of a national study  
389 conducted in Ethiopia, which found around 22% of the variation in SBA was attributed to  
390 differences between communities [39]. The differences between the two studies can be  
391 explained by the fact that in our study, the ICC of the districts was considered, whereas the  
392 national study used enumeration locations to estimate the ICC. The high variations in SBA  
393 attributable to the differences between the districts in our study could be explained by the  
394 uneven distribution of health services, including the differences in the mix and number of  
395 skilled health professionals, the availability of the necessary logistics and supplies for  
396 maternal health services, and other infrastructure like roads, water supply, and electricity in  
397 the districts.

## 398 **Skilled birth attendants and maternal mortality**

399 This study shows that districts with a low proportion of deliveries attended by SBA have a  
400 high maternal mortality. Similar findings have been reported in the 2022 UNICEF report [4].  
401 In places with low SBA, many mothers give birth at home, unattended by skilled health  
402 professionals and without access to life-saving drugs and interventions. This leads to the loss  
403 of many mothers and new-borns due to the risks associated with unattended home delivery

404 [40]. Improving access, quality, and coverage of key interventions, including SBA, saves the  
405 lives of mothers and new-borns [41].

406 Wondogenet district seems to be an exception, with a fairly low MMR in spite of a low  
407 proportion of deliveries using SBA. We think the reason for lower MMR is that the district  
408 has better roads, available transportation for emergencies, a functional local referral  
409 system, and fairly easy access to the regional referral centre in Hawassa.

## 410 **Factors associated with skilled birth attendants**

411 The use of SBA was more common among mothers with an education. This finding agrees  
412 with the studies done in Ethiopia [12, 25] and elsewhere [9, 42]. Mothers' formal education  
413 is associated with better health knowledge and, consequently, with improved use of health  
414 services [43]. Educated women have higher healthcare decision autonomy [44] and are  
415 more likely to plan and prepare for an obstetric emergency [45]; education empowers  
416 women, and consequently, more of them use SBA [46]. However, the association between  
417 mother education and SBA is weak in our study. This shows other factors like ANC,  
418 complications of pregnancy, distance to the nearest hospital, and distribution of services  
419 within the districts play a great role in the use of SBA.

420 The probability of using SBA increased for women who had complications during pregnancy.  
421 Studies conducted in northwest Ethiopia [12] and Bangladesh [47] reported similar findings.  
422 This association can be explained by the fact that mothers with pregnancy complications are  
423 more likely to seek medical care, be advised on the importance of SBA during ANC, and be  
424 referred for SBA [48].

425 This study demonstrated that attendance at antenatal care is a strong predictor of using  
426 SBA. This finding agrees with the studies conducted in Kenya [49] and Ethiopia [25]. This  
427 could be explained by the fact that women who attend ANC will be familiar with the health  
428 system and health facilities, be encouraged and counselled on the importance of SBA by  
429 ANC providers, and get prepared in advance for facility delivery.

430 Compared to primiparous women, multiparous women were less likely to use SBA. A similar  
431 finding has been reported by a study conducted in southern Ghana and Tanzania [19, 50].  
432 Multiparous women may be influenced by their previous experiences and consider  
433 childbirth a natural process. Moreover, multiparous women may have strong cultural ties  
434 and be more influenced by traditional practices.

435 The use of SBA during deliveries is more common among women married to employed men  
436 or traders. A similar finding has been reported from a study conducted in Nigeria [51]. This  
437 could be explained by the fact that employed husbands are more likely to be educated,  
438 better understand the use of SBA, and support their wives to take SBA care and have a  
439 better income, making it easier for the family to cover the costs associated with skilled  
440 delivery care.

## 441 **Accessibility of health centres and hospitals and use of skilled birth** 442 **care**

443 According to the WHO, pregnant women should be able to access EmONC health facilities  
444 within 2 hours of travel time [35, 52]. Our study found that 33% of women reside more than  
445 10 km from the nearest hospital, with great variations by district, meaning a third of the  
446 women have to travel more than 2 hours to access the nearest hospital. Districts where the



447 women live far from the nearest hospital had a lower proportion of delivering women  
448 assisted by SBA. It has also been recommended that, at the national or subnational level, at  
449 least 80% of pregnant women should access the nearest hospital within 2 hours of travel  
450 time [52, 53], but we found in our study three districts where the proportion of pregnant  
451 women who access the nearest hospital in 2 hours is below the recommended 80%.

## 452 Policy implications

453 The low proportion of births attended by SBA with high variations in districts shows the  
454 Sidama National Regional Health Bureau and district health offices should take urgent action  
455 to improve the use of SBA, identify risk factors, and design interventions tailored to the local  
456 context. The association of low SBA with high maternal mortality in districts far away from  
457 the regional centre reaffirms that SBA plays a key role in reducing maternal mortality. It also  
458 signals that the government should give due attention to the remote and distant districts,  
459 addressing the uneven distribution of maternal health services, a lack of skilled health  
460 personnel, and poor infrastructure to improve SBA and consequently decrease the  
461 prevailing maternal mortality. Access to hospitals should be improved through the  
462 construction of hospitals in areas devoid of services. All pregnant mothers should be  
463 encouraged and supported to take ANC.

## 464 Conclusions

465 In Sidama Region, the coverage of SBA is low, with high variation in districts. Low SBA was  
466 associated with high MMR. Corrective actions should be taken to improve the low SBA and  
467 decrease the high MMR. Hospitals should be accessible to pregnant mothers, and the ANC  
468 should be strengthened.

## 469 Acknowledgements

470 We want to thank the participants in the study for their time and information. Our special  
471 thanks go to the Sidama National Regional State Health Bureau, respective district health  
472 offices, and kebele administrations in Ethiopia for their support and permission to conduct  
473 the study. We thank data collectors and clerks for their time and commitment.

474

475

476

477

478

479

480

481

482

483

484

485

486

487

488

489

490

491

492

493

494

## 495 References

- 496 1. Saleem S, McClure EM, Goudar SS, Patel A, Esamai F, Garces A, et al. A prospective study of  
497 maternal, fetal and neonatal deaths in low- and middle-income countries. Bulletin of the  
498 World Health Organization. 2014;92(8):605-12. doi: [10.2471/BLT.13.127464](https://doi.org/10.2471/BLT.13.127464) PMID:  
499 [PMC4147405](https://pubmed.ncbi.nlm.nih.gov/25489184/)
- 500 2. WHO. Defining competent maternal and new-born health professionals. Joint statement by  
501 WHO, UNFPA, UNICEF, ICM, ICN, FIGO and IPA. Geneva: World Health Organization. 2018.  
502 Available from: <https://apps.who.int/iris/handle/10665/272817>
- 503 3. Sustainable Development Goals. Every Woman, Every Child: The Global Strategy for  
504 Women's, Children's and Adolescents' Health (2016-2030). 2015.
- 505 4. United Nations Children's Fund. Delivering for Women: Improving maternal health services  
506 to save lives. New York: UNICEF. 2022.
- 507 5. Girum T, Wasie A. Correlates of maternal mortality in developing countries: an ecological  
508 study in 82 countries. Maternal health, neonatology and perinatology. 2017;3:19. doi:  
509 [10.1186/s40748-017-0059-8](https://doi.org/10.1186/s40748-017-0059-8) PMID: [29142757](https://pubmed.ncbi.nlm.nih.gov/29142757/)
- 510 6. Berhan Y, Berhan A. Skilled health personnel attended delivery as a proxy indicator for  
511 maternal and perinatal mortality: a systematic review. Ethiopian journal of health  
512 sciences. 2014; 24 Suppl (0 Suppl):69-80. doi: [10.4314/ejhs.v24i1.7S](https://doi.org/10.4314/ejhs.v24i1.7S)  
513 PMID: [25489184](https://pubmed.ncbi.nlm.nih.gov/25489184/)
- 514 7. Vadrevu L, Kanjilal B. Measuring spatial equity and access to maternal health services using  
515 enhanced two step floating catchment area method (E2SFCA) - a case study of the Indian  
516 Sundarbans. International journal for equity in health. 2016;15:87. doi: [10.1186/s12939-  
517 016-0376-y](https://doi.org/10.1186/s12939-016-0376-y) PMID: [PMC4897818](https://pubmed.ncbi.nlm.nih.gov/25489184/)

- 518 8. Crowe S, Utley M, Costello A, Pagel C. How many births in sub-Saharan Africa and South Asia  
519 will not be attended by a skilled birth attendant between 2011 and 2015? BMC pregnancy  
520 and childbirth. 2012;12:4. [10.1186/1471-2393-12-4](https://doi.org/10.1186/1471-2393-12-4) PMID: [PMC3274439](https://pubmed.ncbi.nlm.nih.gov/2274439/)
- 521 9. Tessema ZT, Tesema GA. Pooled prevalence and determinants of skilled birth attendant  
522 delivery in East Africa countries: a multilevel analysis of Demographic and Health Surveys.  
523 Italian journal of pediatrics. 2020;46:177. doi: [10.1186/s13052-020-00943-z](https://doi.org/10.1186/s13052-020-00943-z) PMID:  
524 [PMC7708172](https://pubmed.ncbi.nlm.nih.gov/37708172/)
- 525 10. Ayele GS, Melku AT, Belda SS. Utilization of skilled birth attendant at birth and associated  
526 factors among women who gave birth in the last 24 months preceding the survey in Gura  
527 Dhamole Woreda, Bale zone, southeast Ethiopia. BMC public health. 2019;19:1501.  
528 doi: [10.1186/s12889-019-7818-6](https://doi.org/10.1186/s12889-019-7818-6) PMID: [PMC6849185](https://pubmed.ncbi.nlm.nih.gov/36849185/)
- 529 11. Kea AZ, Lindtjorn B, Gebretsadik A, Hinderaker SG. Variation in maternal mortality in Sidama  
530 National Regional State, southern Ethiopia: A population based cross sectional household  
531 survey. PloS one.2023;18(3):e0272110. doi: [10.1371/journal.pone.0272110](https://doi.org/10.1371/journal.pone.0272110) PMID:  
532 [PMC9990948](https://pubmed.ncbi.nlm.nih.gov/40990948/)
- 533 12. Alemayehu M, Mekonnen W. The Prevalence of Skilled Birth Attendant Utilization and Its  
534 Correlates in North West Ethiopia. BioMed research international. 2015;2015:436938.  
535 doi: [10.1155/2015/436938](https://doi.org/10.1155/2015/436938) PMID: [PMC4609361](https://pubmed.ncbi.nlm.nih.gov/2609361/)
- 536 13. Seboka BT, Mamo TT, Mekonnen T. Identifying geographical inequalities of maternal care  
537 utilization in Ethiopia: a Spatio-temporal analysis from 2005 to 2019. BMC health services  
538 research. 2022;22:1455. doi: [10.1186/s12913-022-08850-1](https://doi.org/10.1186/s12913-022-08850-1) PMID: [PMC9714149](https://pubmed.ncbi.nlm.nih.gov/39714149/)
- 539 14. Ayalew HG, Liyew AM, Tessema ZT, Worku MG, Tesema GA, Alamneh TS, et al. Spatial  
540 variation and factors associated with home delivery after ANC visit in Ethiopia; spatial and  
541 multilevel analysis. PloS one. 2022;17(8):e0272849. doi: [10.1371/journal.pone.0272849](https://doi.org/10.1371/journal.pone.0272849)  
542 PMID: [PMC9409554](https://pubmed.ncbi.nlm.nih.gov/409554/)

- 543 15. Bediako VB, Boateng ENK, Owusu BA, Dickson KS. Multilevel geospatial analysis of factors  
544 associated with unskilled birth attendance in Ghana. PloS one. 2021;16(6):e0253603.  
545 doi: [10.1371/journal.pone.0253603](https://doi.org/10.1371/journal.pone.0253603) PMID: [PMC8232528](https://pubmed.ncbi.nlm.nih.gov/348232528/)
- 546 16. Gilano G, Hailegebreal S, Seboka BT. Determinants and spatial distribution of institutional  
547 delivery in Ethiopia: evidence from Ethiopian Mini Demographic and Health Surveys 2019.  
548 Archives of public health = Archives belges de sante publique. 2022;80:65.  
549 doi: [10.1186/s13690-022-00825-2](https://doi.org/10.1186/s13690-022-00825-2) PMID: [PMC8862569](https://pubmed.ncbi.nlm.nih.gov/368862569/)
- 550 17. Mishra PS, Sinha D, Kumar P, Srivastava S. Spatial inequalities in skilled birth attendance in  
551 India: a spatial-regional model approach. BMC public health. 2022;22:79. doi:  
552 [10.1186/s12889-021-12436-7](https://doi.org/10.1186/s12889-021-12436-7) PMID: [PMC8756682](https://pubmed.ncbi.nlm.nih.gov/368756682/)
- 553 18. World Health Organization. Strategies towards ending preventable maternal mortality  
554 (EPMM). 2015. Available from: <https://apps.who.int/iris/handle/10665/153544>
- 555 19. Manyeh AK, Akpakli DE, Kukula V, Ekey RA, Narh-Bana S, Adjei A, et al. Socio-demographic  
556 determinants of skilled birth attendant at delivery in rural southern Ghana. BMC research  
557 notes. 2017;10:268. doi: [10.1186/s13104-017-2591-z](https://doi.org/10.1186/s13104-017-2591-z) PMID: [PMC5504761](https://pubmed.ncbi.nlm.nih.gov/35504761/)
- 558 20. Okonofua F, Ntoimo L, Ogungbangbe J, Anjorin S, Imongan W, Yaya S. Predictors of women's  
559 utilization of primary health care for skilled pregnancy care in rural Nigeria. BMC pregnancy  
560 and childbirth. 2018;18:106. doi: [10.1186/s12884-018-1730-4](https://doi.org/10.1186/s12884-018-1730-4) PMID:  
561 [PMC5907371](https://pubmed.ncbi.nlm.nih.gov/35907371/)
- 562 21. Higgins-Steele A, Burke J, Foshanji AI, Farewar F, Naziri M, Seddiqi S, et al. Barriers  
563 associated with care-seeking for institutional delivery among rural women in three provinces  
564 in Afghanistan. BMC pregnancy and childbirth. 2018;18:246. doi: [10.1186/s12884-018-](https://doi.org/10.1186/s12884-018-1890-2)  
565 [1890-2](https://doi.org/10.1186/s12884-018-1890-2) PMID: [PMC6006744](https://pubmed.ncbi.nlm.nih.gov/36006744/)
- 566 22. Central Statistical Agency Ethiopia: The DHS Program ICF Rockville M, USA. Demographic and  
567 Health Survey 2016 Final Report: 2017.

- 568 23. WHO, UNICEF, UNFPA, BANK W, UNPD. Trends in Maternal Mortality:2000-2017. WHO,  
569 UNICEF, UNFPA, UNDP and The World Bank estimates. 2019. Available from:  
570 <https://apps.who.int/iris/handle/10665/327596>
- 571 24. Tarekegn W, Tsegaye S, Berhane Y. Skilled birth attendant utilization trends,  
572 determinant and inequality gaps in Ethiopia. BMC women's health. 2022;22:466. doi:  
573 [10.1186/s12905-022-01995-5](https://doi.org/10.1186/s12905-022-01995-5) PMID: [PMC9682649](https://pubmed.ncbi.nlm.nih.gov/3682649/).
- 574 25. Abebe HT, Adhana MT, Gebremichael MW, Gezae KE, Gebreslassie AA. Magnitude, trends  
575 and determinants of skilled delivery from Kilite-Awlaelo Health Demographic Surveillance  
576 System, Northern Ethiopia, 2009- 2017. PloS one. 2021;16(9):e0254146. doi:  
577 [10.1371/journal.pone.0254146](https://doi.org/10.1371/journal.pone.0254146) PMID: [PMC8428565](https://pubmed.ncbi.nlm.nih.gov/36428565/)
- 578 26. Alamneh TS, Teshale AB, Yeshaw Y, Alem AZ, Ayalew HG, Liyew AM, et al. Barriers for health  
579 care access affects maternal continuum of care utilization in Ethiopia; spatial analysis and  
580 generalized estimating equation. PloS one. 2022;17(4):e0266490. doi:  
581 [10.1371/journal.pone.0266490](https://doi.org/10.1371/journal.pone.0266490) PMID: [PMC9032438](https://pubmed.ncbi.nlm.nih.gov/369032438/)
- 582 27. Kea AZ, Lindtjorn B, Gebretsadik A, Hinderaker SG. Reduction in maternal mortality ratio  
583 varies by district in Sidama Regional State, southern Ethiopia: Estimates by cross-sectional  
584 studies using the sisterhood method and a household survey of pregnancy and birth  
585 outcomes. medRxiv 280613 [preprint] [posted 2022 October 042022. Available  
586 from: <https://medrxiv.org/cgi/content/short/2022.10.02.22280613v1>
- 587 28. Acquah E, Nyarko SH, Boateng ENK, Dickson KS, Addo IY, Adzrago D. Spatial and multilevel  
588 analysis of unskilled birth attendance in Chad. BMC public health. 2022;22:1561. doi:  
589 [10.1186/s12889-022-13972-6](https://doi.org/10.1186/s12889-022-13972-6) PMID: [PMC9382725](https://pubmed.ncbi.nlm.nih.gov/369382725/)
- 590 29. Windsma M, Vermeiden T, Braat F, Tsegaye AM, Gaym A, van den Akker T, et al. Emergency  
591 obstetric care provision in Southern Ethiopia: a facility-based survey. BMJ.  
592 2017;7(11):e018459. : doi: [10.1136/bmjopen-2017-018459](https://doi.org/10.1136/bmjopen-2017-018459) PMID: [PMC5695514](https://pubmed.ncbi.nlm.nih.gov/365695514/)

- 593 30. Ministry of Health. Health Extension Programme in Ethiopia. 2007.  
594 <https://www.moh.gov.et/site/directorates/health-extension>
- 595 31. Vyas S, Kumaranayake L. Constructing socio-economic status indices: how to use principal  
596 components analysis. Health policy and planning. 2006;21(6):459-68. doi:  
597 [10.1093/heapol/czl029](https://doi.org/10.1093/heapol/czl029)
- 598 32. Al-Taiar A, Clark A, Longenecker JC, Whitty CJ. Physical accessibility and utilization of health  
599 services in Yemen. International journal of health geographics. 2010;9:38.  
600 doi: [10.1186/1476-072X-9-38](https://doi.org/10.1186/1476-072X-9-38) PMID: [PMC2914054](https://pubmed.ncbi.nlm.nih.gov/2914054/)
- 601 33. Nesbitt RC, Gabrysch S, Laub A, Soremekun S, Manu A, Kirkwood BR, et al. Methods to  
602 measure potential spatial access to delivery care in low- and middle-income countries: a  
603 case study in rural Ghana. International journal of health geographics. 2014;13:25. doi:  
604 [10.1186/1476-072X-13-25](https://doi.org/10.1186/1476-072X-13-25) PMID: [PMC4086697](https://pubmed.ncbi.nlm.nih.gov/24086697/)
- 605 34. Ethiopian Public Health Institute (EPHI) Ethiopia and ICF. Ethiopia Mini Demographic and  
606 Health Survey 2019: key indicators. Rockville, Maryland, USA: EPHI and ICF.
- 607 35. WHO, UNICEF, UNFPA, AMDD. Monitoring Emergency Obstetric Care, a handbook. WHO  
608 Publications. Geneva, Switzerland: World Health Organization. 2009. Available from:  
609 <https://apps.who.int/iris/handle/10665/44121>
- 610 36. Ray N, Ebener S. AccessMod 3.0: computing geographic coverage and accessibility to health  
611 care services using anisotropic movement of patients. International journal of health  
612 geographics. 2008;7:63. doi: [10.1186/1476-072X-7-63](https://doi.org/10.1186/1476-072X-7-63) PMID: [PMC2651127](https://pubmed.ncbi.nlm.nih.gov/2651127/)
- 613 37. Pourhoseingholi MA, Baghestani AR, Vahedi M. How to control confounding effects by  
614 statistical analysis. Gastroenterology and hepatology from bed to bench. 2012;5(2):79-83.  
615 PMID: [24834204](https://pubmed.ncbi.nlm.nih.gov/24834204/)
- 616 38. Ethiopia Ministry of Health. Health Sector Transformation Plan: 2020-2025. 2021.

- 617 39. Tolossa T, Bekele D. Multilevel analysis of skilled birth attendance and associated factors  
618 among reproductive age women in Ethiopia: Data from EDHS 2016. International Journal of  
619 Africa Nursing Sciences. 2020.
- 620 40. Ndola Prata , Paige Passano , Tami Rowen , Suzanne Bell , Julia Walsh, Potts M. Where There  
621 Are (Few) Skilled Birth Attendants. Journal of Health, Population and Nutrition.  
622 2011;29(2):81-9. doi: [10.3329/jhpn.v29i2.7812](https://doi.org/10.3329/jhpn.v29i2.7812) PMID: [PMC3126980](https://pubmed.ncbi.nlm.nih.gov/3126980/)
- 623 41. Bhutta ZA, Das JK, Bahl R, Lawn JE, Salam RA, Paul VK, et al. Can available interventions end  
624 preventable deaths in mothers, newborn babies, and stillbirths, and at what cost?  
625 Lancet. 2014;384(9940):347-70. doi: [10.1016/S0140-6736\(14\)60792-3](https://doi.org/10.1016/S0140-6736(14)60792-3) PMID:  
626 [24853604](https://pubmed.ncbi.nlm.nih.gov/24853604/)
- 627 42. Solanke BL, Rahman SA. Multilevel analysis of factors associated with assistance during  
628 delivery in rural Nigeria: implications for reducing rural-urban inequity in skilled care at  
629 delivery. BMC pregnancy and childbirth. 2018;18:438. doi: [10.1186/s12884-018-2074-](https://doi.org/10.1186/s12884-018-2074-9)  
630 [9](https://doi.org/10.1186/s12884-018-2074-9) PMID: [PMC6225672](https://pubmed.ncbi.nlm.nih.gov/36225672/).
- 631 43. Greenaway ES, Leon J, Baker DP. Understanding the association between maternal  
632 education and use of health services in Ghana: exploring the role of health knowledge.  
633 Journal of biosocial science. 2012;44(6):733-47. doi: [10.1017/S0021932012000041](https://doi.org/10.1017/S0021932012000041)  
634 PMID: [PMC3590019](https://pubmed.ncbi.nlm.nih.gov/3590019/)
- 635 44. Kassahun A, Zewdie A. Decision-making autonomy in maternal health service use and  
636 associated factors among women in Mettu District, Southwest Ethiopia: a community-based  
637 cross-sectional study. BMJ open. 2022;12(5):e059307. doi: [10.1136/bmjopen-2021-](https://doi.org/10.1136/bmjopen-2021-059307)  
638 [059307](https://doi.org/10.1136/bmjopen-2021-059307) PMID: [PMC9062806](https://pubmed.ncbi.nlm.nih.gov/39062806/)
- 639 45. Ketema DB, Leshargie CT, Kibret GD, Assemie MA, Petrucka P, Alebel A. Effects of maternal  
640 education on birth preparedness and complication readiness among Ethiopian pregnant



- 641 women: a systematic review and meta-analysis. BMC pregnancy and childbirth.  
642 2020;20:149. doi: [10.1186/s12884-020-2812-7](https://doi.org/10.1186/s12884-020-2812-7) PMID: [PMC7060625](https://pubmed.ncbi.nlm.nih.gov/327060625/)
- 643 46. Dickson KS, Adde KS, Ameyaw EK. Women empowerment and skilled birth attendance in  
644 sub-Saharan Africa: A multi-country analysis. PloS one. 2021;16(7):e0254281.  
645 doi: [10.1371/journal.pone.0254281](https://doi.org/10.1371/journal.pone.0254281) PMID: [PMC8263257](https://pubmed.ncbi.nlm.nih.gov/3263257/)
- 646 47. Islam N, Islam MT, Yoshimura Y. Practices and determinants of delivery by skilled birth  
647 attendants in Bangladesh. Reproductive health. 2014;11:86. doi: [10.1186/1742-4755-11-](https://doi.org/10.1186/1742-4755-11-86)  
648 [86](https://doi.org/10.1186/1742-4755-11-86) PMID: [PMC4292816](https://pubmed.ncbi.nlm.nih.gov/2292816/)
- 649 48. Gabrysch S, Campbell OM. Still too far to walk: literature review of the determinants of  
650 delivery service use. BMC pregnancy and childbirth. 2009;9:34. doi: [10.1186/1471-2393-](https://doi.org/10.1186/1471-2393-9-34)  
651 [9-34](https://doi.org/10.1186/1471-2393-9-34) PMID: [PMC2744662](https://pubmed.ncbi.nlm.nih.gov/2744662/)
- 652 49. Gitimu A, Herr C, Oruko H, Karijo E, Gichuki R, Ofware P, et al. Determinants of use of skilled  
653 birth attendant at delivery in Makeni, Kenya: a cross sectional study. BMC pregnancy and  
654 childbirth. 2015;15:9. doi: [10.1186/s12884-015-0442-2](https://doi.org/10.1186/s12884-015-0442-2) PMID: [PMC4324035](https://pubmed.ncbi.nlm.nih.gov/24324035/)
- 655 50. Damian DJ, Tibelerwa JY, John B, Philemon R, Mahande MJ, Msuya SE. Factors influencing  
656 utilization of skilled birth attendant during childbirth in the Southern highlands, Tanzania: a  
657 multilevel analysis. BMC pregnancy and childbirth. 2020;20:420. doi: [10.1186/s12884-](https://doi.org/10.1186/s12884-020-03110-8)  
658 [020-03110-8](https://doi.org/10.1186/s12884-020-03110-8) PMID: [PMC7382099](https://pubmed.ncbi.nlm.nih.gov/37382099/)
- 659 51. Adewemimo AW, Msuya SE, Olaniyan CT, Adegoke AA. Utilisation of skilled birth attendance  
660 in Northern Nigeria: a cross-sectional survey. Midwifery. 2014;30(1):e7-e13. doi:  
661 [10.1016/j.midw.2013.09.005](https://doi.org/10.1016/j.midw.2013.09.005)
- 662 52. Ebener S, Stenberg K, Brun M, Monet JP, Ray N, Sobel HL, et al. Proposing standardised  
663 geographical indicators of physical access to emergency obstetric and newborn care in low-  
664 income and middle-income countries. BMJ global health. 2019;4(Suppl 5):e000778. doi:  
665 [10.1136/bmjgh-2018-000778](https://doi.org/10.1136/bmjgh-2018-000778) PMID: [PMC6623986](https://pubmed.ncbi.nlm.nih.gov/36623986/)

666 53. Meara JG, Greenberg SL. The Lancet Commission on Global Surgery Global surgery 2030:  
667 Evidence and solutions for achieving health, welfare and economic development.  
668 Surgery. 2015;157(5):834-5. doi: [10.1016/j.surg.2015.02.009](https://doi.org/10.1016/j.surg.2015.02.009)

669

670
